# Supplementary material for: Thymine based copolymers: feasible sensors for the detection of persistent organic pollutants in water
Source: Royal Society of Chemistry journal article supplement (doi:10.1039/c7ra08868j), 2017-01-01
Supplement: c7ra08868j1.pdf [file c7ra08868j1.pdf]

Manuscript ID: RA-ART-08-2017-008868

TITLE: THYMINE BASED COPOLYMERS: FEASIBLE SENSORS FOR THE DETECTION OF PERSISTENT ORGANIC POLLUTANTS IN WATER

## Supporting Information

### Section 2.2. Random Copolymer Synthesis and Characterization

VBT:VPS 1:1, 1:4, 1:8 and 1:16 copolymers were synthesized as described in the manuscript.

Molecular weight analysis were performed by size exclusion chromatography coupled to multi-angle laser light scattering (SEC/MALLS), with the following conditions: TKS PW 2500&4000 columns calibrated with poly(styrene sulfonate) sodium salt (PSS) standards (Jordi Labs LLC, USA); mobile phase: 70/30 mixture of water (containing 0.05M Na<sub>2</sub>SO<sub>4</sub> + 0.01M Na<sub>2</sub>HPO<sub>4</sub>, pH 8-9) and methanol; flow rate: 0.6 mL/min; dn/dc: 0.16. Results are presented in Table S1.

NMR spectra were taken on a Bruker 300 MHz spectrometer. <sup>1</sup>H NMR results for the copolymers are presented in Fig. S1 a-d. The absence of the vinyl protons from VBT and VPS monomers, typically between 5 and 6 ppm, confirm that the polymerization was complete in each case.

**Table S1** Molecular weight analysis by SEC/MALLS

| Copolymer    | Mn (kDa) | Mw (kDa) | D <sup>a</sup> |
|--------------|----------|----------|----------------|
| VBT:VPS 1:1  | 14.9     | 84.0     | 5.64           |
| VBT:VPS 1:4  | 17.5     | 107.1    | 6.12           |
| VBT:VPS 1:8  | 34.8     | 139.8    | 4.02           |
| VBT:VPS 1:16 | 38.6     | 181.0    | 4.69           |

<sup>a</sup> Polydispersion D = Mw/Mn

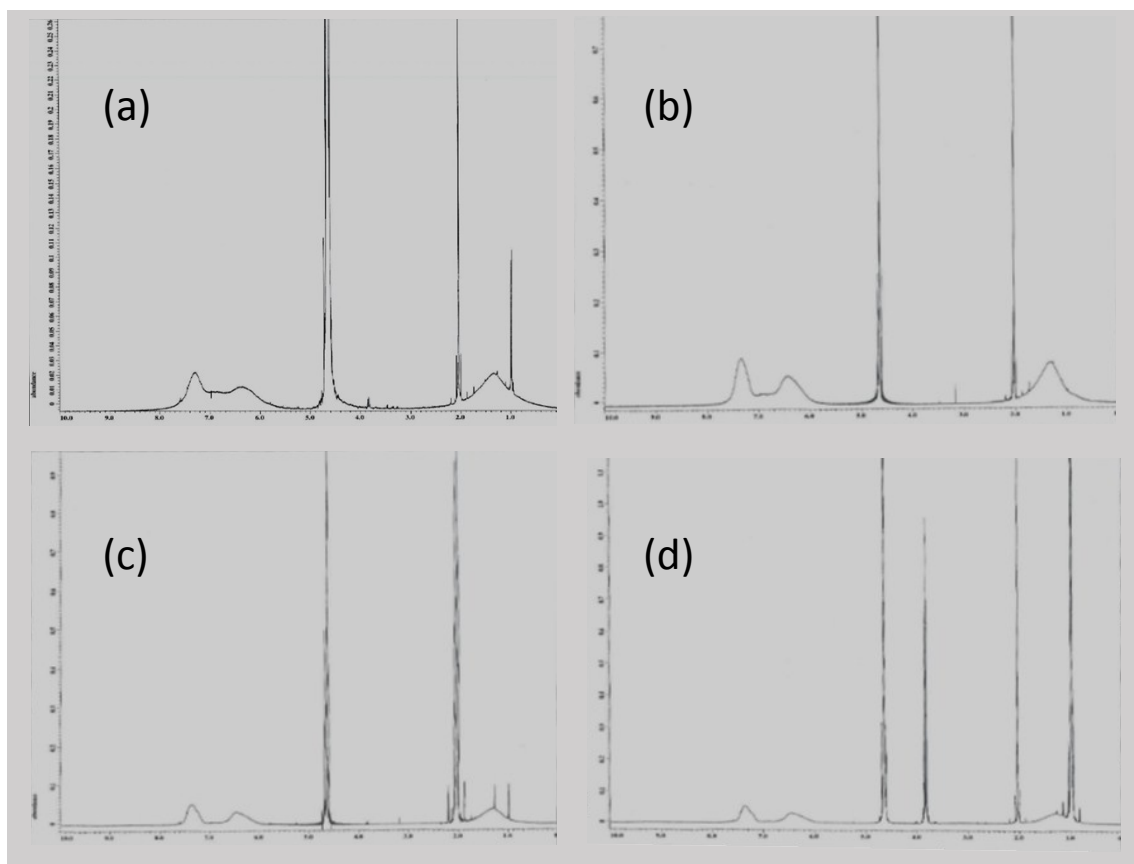

**Fig. S1** <sup>1</sup>H NMR spectra for copolymers. (a) VBT:VPS 1:1. (b) VBT:VPS 1:4. (c) VBT:VPS 1:8. (d) VBT:VPS 1:16.
